# Supplementary material for: PrimerProspector: de novo design and taxonomic analysis of barcoded polymerase chain reaction primers
Source: PubMed Central journal article supplement — Bioinformatics. 2011 Feb 23;27(8):1159–61. doi: 10.1093/bioinformatics/btr087 (PMC3072552; doi:10.1093/bioinformatics/btr087), 2011-02-23
Supplement: supp_btr087_Figure_S3.pdf [file supp_btr087_Figure_S3.pdf]

338r; Degeneracy: 1; GC content 0.67 - 0.67

5'-GCTGCCTCCCGTAGGAGT-3'  
Sequences tested: bacterial\_v16.fasta

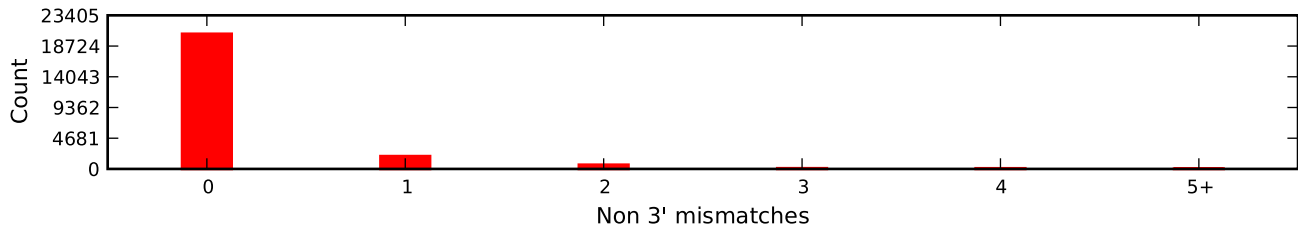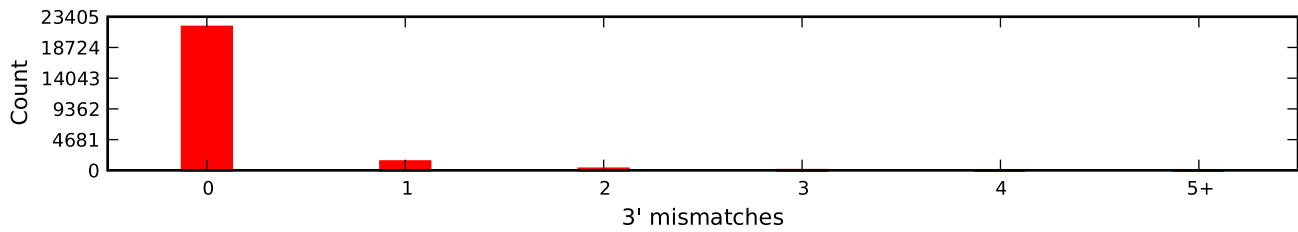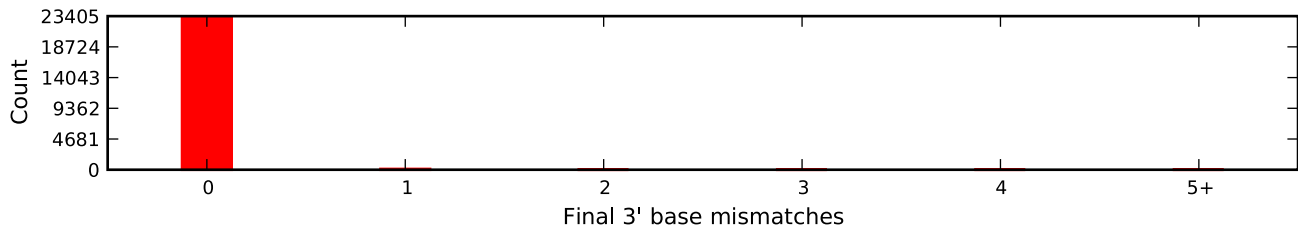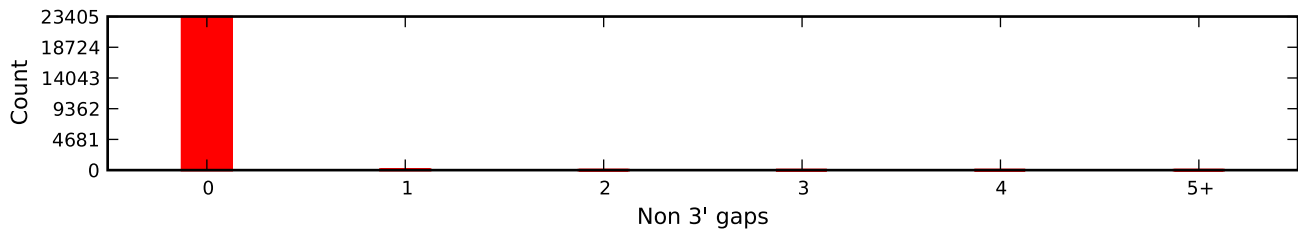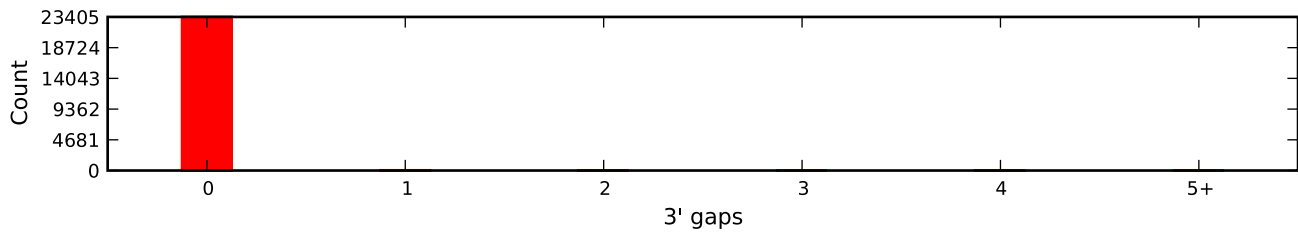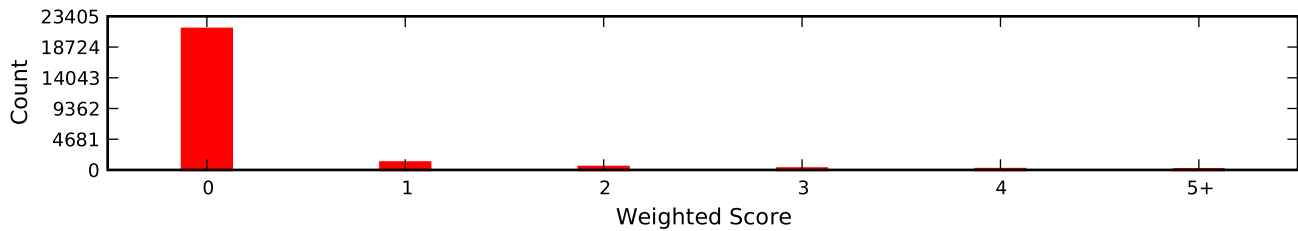

3' length: 5 nucleotides

Weighted score = non-3' mismatches \* 0.40 + 3' mismatches \* 1.00 + non 3' gaps \* 1.00 + 3' gaps \* 3.00

An additional 3.00 penalty is assigned if the final 3' base mismatches

Weighted score is rounded to the nearest whole number in this graphical display
