# Supplementary figures and images for: PrimerProspector: de novo design and taxonomic analysis of barcoded polymerase chain reaction primers
Source: PubMed Central journal article supplement — Bioinformatics. 2011 Feb 23;27(8):1159–61. doi: 10.1093/bioinformatics/btr087 (PMC3072552; doi:10.1093/bioinformatics/btr087), 2011-02-23

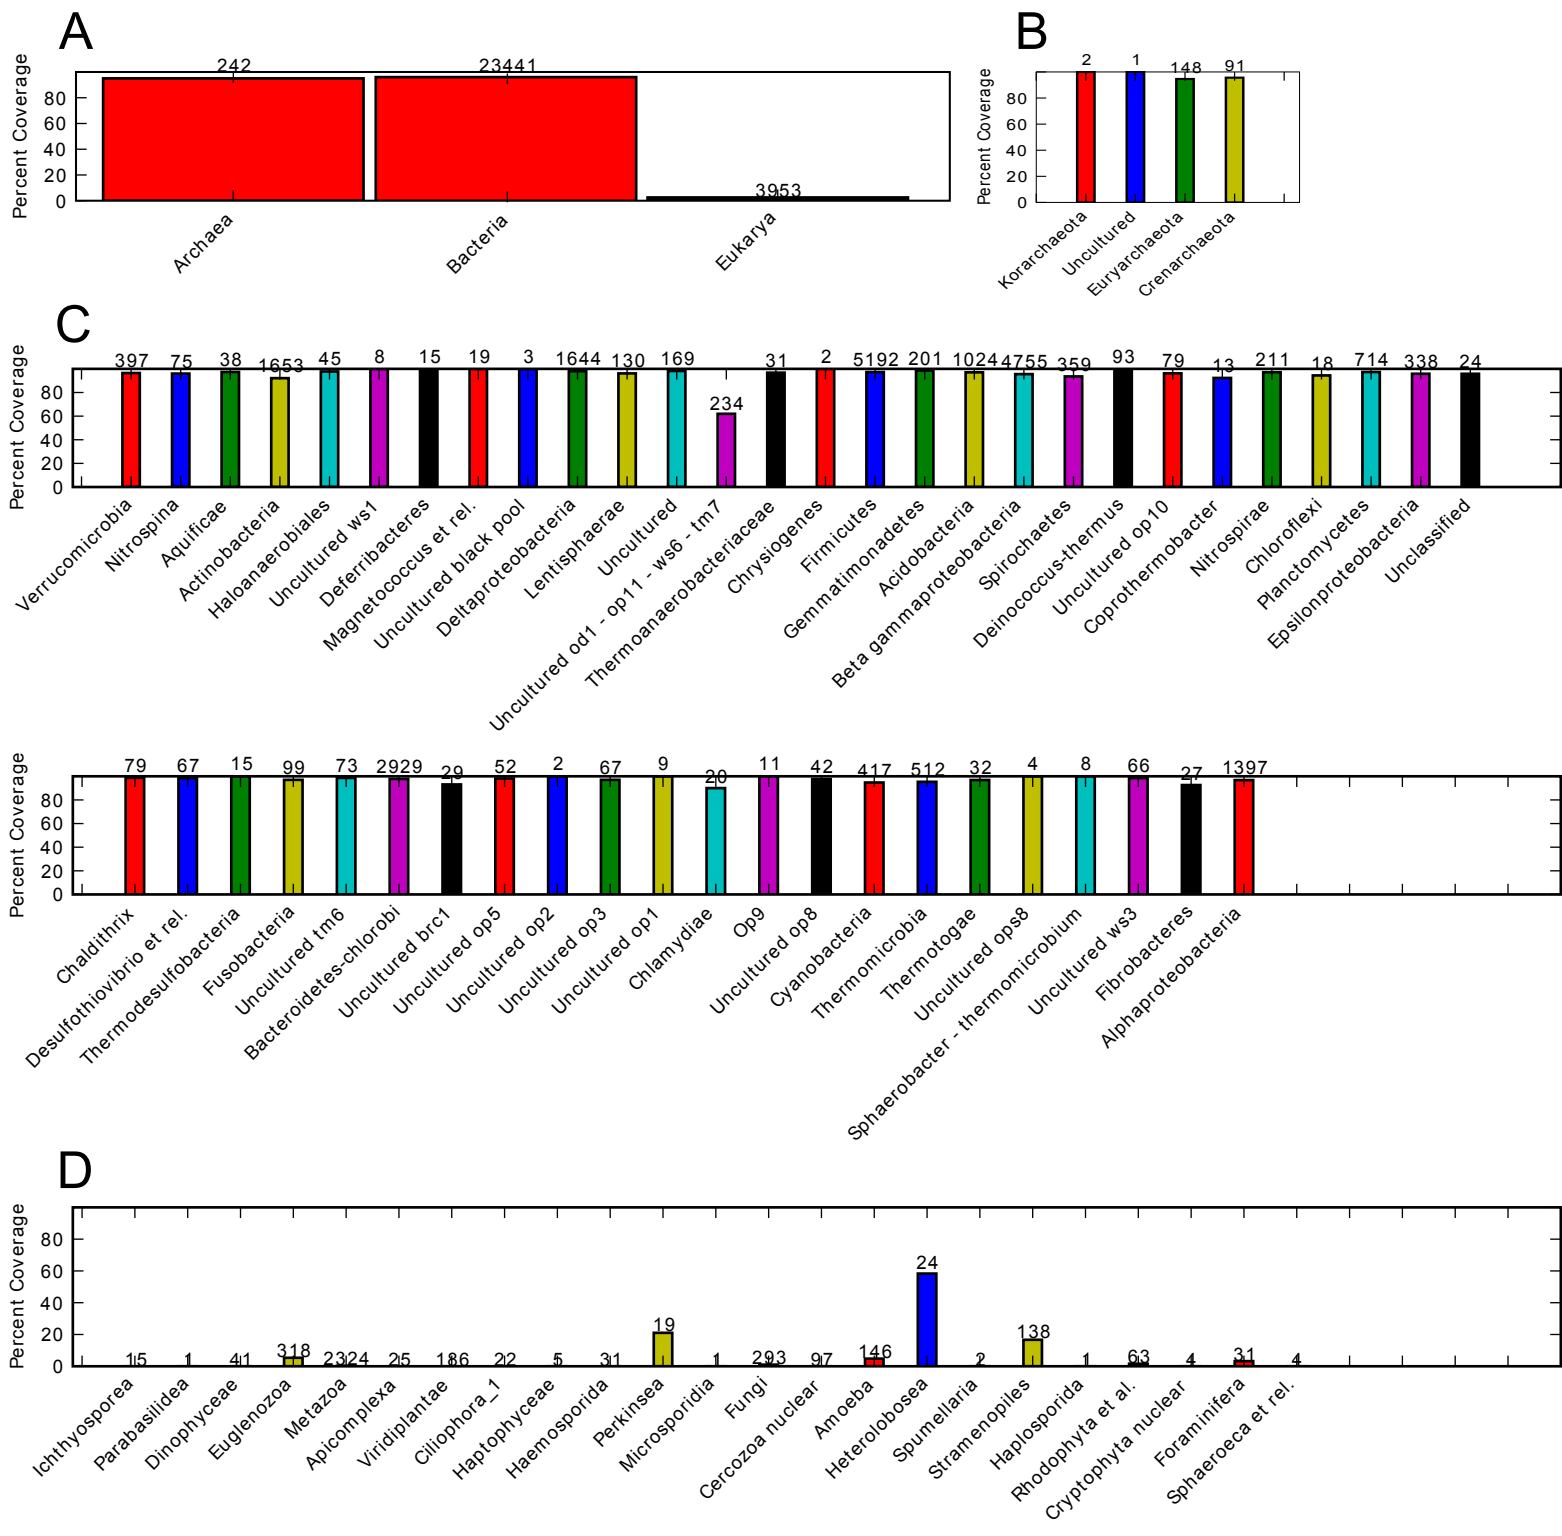

Supplement: supp_btr087_Figure_S1.pdf [file supp_btr087_Figure_S1.pdf]
